# Supplementary material for: An in-depth understanding of the bimetallic effects and coked carbon species on an active bimetallic Ni(Co)/Al2O3dry reforming catalyst
Source: Royal Society of Chemistry journal article supplement (doi:10.1039/c6cp01089j), 2016-01-01
Supplement: c6cp01089j1.pdf [file c6cp01089j1.pdf]

Supplementary Information

**In-depth understanding of the bimetallic effects and coked carbon species on an active bimetallic Ni(Co)/Al<sub>2</sub>O<sub>3</sub> dry reforming catalyst**

Xin Liao,<sup>a,b</sup> Rihards Gerdtis,<sup>a</sup> Stewart F. Parker<sup>c</sup>, Lina Chi,<sup>a,d</sup> Yongxiang Zhao<sup>b</sup>, Martyn Hill<sup>a</sup>, Junqiu Guo<sup>a</sup>, Martin O. Jones<sup>c,e\*</sup>, Zheng Jiang<sup>a,b\*</sup>

a. Faculty of Engineering and the Environment, University of Southampton, Highfield, Southampton, SO17 1BJ, U.K.

b. Department of Chemistry and Chemical Engineering, Shanxi University, Taiyuan, 030006, China

c. ISIS Facility, STFC Rutherford Appleton Laboratory, Chilton, Didcot, OX11 0QX, UK

d. School of Environmental Science and Engineering, Shanghai Jiao Tong University, 200240, China

e School of Chemistry, North Haugh, St Andrews, Fife, KY16 9ST, Scotland, United Kingdom

\*Corresponding author: z.jiang@soton.ac.uk (ZJ) & martin-owen.jones@stfc.ac.uk (MOJ)

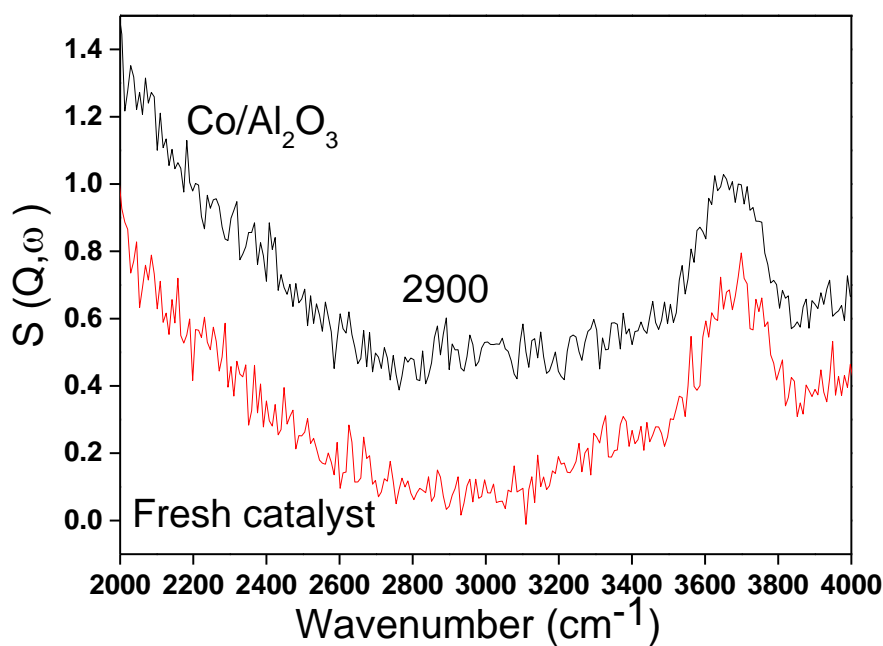

Fig.S1 INS spectra of fresh and spent Co/Al<sub>2</sub>O<sub>3</sub> catalyst using the MAPS spectrometer operating an incident neutron energy of 4840 cm<sup>-1</sup>
